# Supplementary material
Source: MDPI journal article supplement (https://www.mdpi.com/2071-1050/15/19/14582)
Supplement: s1 [file s1]

Archive with 2 entries (2 files):
- PRISMA_2020_checklist.pdf
- sustainability-2578556-supplementary.xlsx
