# Supplementary material
Source: MDPI journal article supplement (https://www.mdpi.com/2071-1050/15/19/14582)
Supplement: s1 [file s1 › sustainability-2578556-supplementary.xlsx]

## Sheet: Sheet1
N.	Year	Type	Region	Country	Variety	Model Projection	Model	Model_Type	Model_Category	Climate Scenarios	Climate Subscenario		Reference
2	2006	Research	North America	Mexico	Coffea Arabica L.	2020	Econometric model	Stochastic	Regression models				Gay, C.; Estrada, F.; Conde, C.; Eakin, H.; Villers, L. Potential Impacts of Climate Change on Agriculture: A Case of Study of Coffee Production in Veracruz, Mexico. Clim. Change 2006, 79 (3–4), 259–288. https://doi.org/10.1007/s10584-006-9066-x.
3	2008	Research	South America	Brazil	Coffea Arabica L.	2050	Thermal Constant Model	Determinsitic	Species distribution models	SRES	A2, B2		Ghini, R.; Hamada, E.; Pedro Jr., M. J.; Marengo, J. A.; Gonçalves, R. R. D. V. Risk Analysis of Climate Change on Coffee Nematodes and Leaf Miner in Brazil. Pesqui. Agropecu. Bras. 2008, 43 (2), 187–194. https://doi.org/10.1590/S0100-204X2008000200005.
4	2009	Research	North America	Mexico	Coffea Arabica L.	2050	Maxent	Stochastic	Species distribution models	SRES	A1F1 ,A2a		Schroth, G.; Laderach, P.; Dempewolf, J.; Philpott, S.; Haggar, J.; Eakin, H.; Castillejos, T.; Moreno, J. G.; Pinto, L. S.; Hernandez, R.; Eitzinger, A.; Ramirez-Villegas, J. Towards a Climate Change Adaptation Strategy for Coffee Communities and Ecosystems in the Sierra Madre de Chiapas, Mexico. Mitig. Adapt. Strateg. Glob. Chang. 2009, 14 (7), 605–625. https://doi.org/10.1007/s11027-009-9186-5.
5	2010	Research	North America	Costa Rica, Guatemala and Nicaragua	Not Mentioned		Dynamic Model	Stochastic	Crop models				van Oijen, M.; Dauzat, J.; Harmand, J.-M.; Lawson, G.; Vaast, P. Coffee Agroforestry Systems in Central America: II. Development of a Simple Process-Based Model and Preliminary Results. Agrofor. Syst. 2010, 80 (3), 361–378. https://doi.org/10.1007/s10457-010-9291-1.
6	2011	Chapter	North America	Nicaragua and Maxico	Coffea Arabica L.	2050	Maxent and CaNaSTA	Stochastic	Species distribution models	SRES	A2A		Laderach, P.; Lundy, M.; Jarvis, A.; Ramirez, J.; Portilla, E. P.; Schepp, K.; Eitzinger, A. Predicted Impact of Climate Change on Coffee Supply Chains. Clim. Chang. Manag. 2011, 703–723. https://doi.org/10.1007/978-3-642-14776-0_42.
7	2011	Research	South America	Brazil	Coffea Arabica L.	2080	Multivariate Analysis	Determinsitic	Regression models	SRES	A2		De Alves, M. C.; De Carvalho, L. G.; Pozza, E. A.; Sanches, L.; De Maia, J. C. S. Ecological Zoning of Soybean Rust, Coffee Rust and Banana Black Sigatoka Based on Brazilian Climate Changes. In Procedia Environmental Sciences; 2011; Vol. 6, pp 35–49. https://doi.org/10.1016/j.proenv.2011.05.005.
8	2018	Research	South America	Brazil	Coffea Arabica L.		Agrometerological Models	Stochastic	Crop models				de Oliveira Aparecido, L. E.; Rolim, G. de S. Forecasting of the Annual Yield of Arabic Coffee Using Water Deficiency. Pesqui. Agropecu. Bras. 2018, 53 (12), 1299–1310. https://doi.org/10.1590/S0100-204X2018001200002
9	2011	Chapter	Africa	Burundi, Ethiopia, Kenya, Malawi, Rwanda, Tanzania, Uganda and Zambia,	Coffea Arabica L.	2050;2080	Multiple regression Model	Determinsitic	Regression models	SRES	A1B ,A2		RIDLEY, FRANCES, V. The Past and Future Climatic Suitability of Arabica Coffee (Coffea Arabica L.) in East Africa. 2011, 128.
10	2011	Research	South America	Brazil	Coffea Arabica L.	2080	Empirical Disease model	Stochastic	Species distribution models	SRES	B1, A2		Ghini, R.; Hamada, E.; Pedro Jr., M. J.; Gonçalves, R. R. V. Incubation Period of Hemileia Vastatrix in Coffee Plants in Brazil Simulated under Climate Change [Simulação Dos Efeitos Das Mudanças Climáticas Sobre o Período de Incubação de Hemileia Vastatrix Em Cafeeiro No Brasil]. Summa Phytopathol. 2011, 37 (2), 85–93. https://doi.org/10.1590/S0100-54052011000200001.
11	2011	Research	South America	Colombia and Brazil	Coffea Arabica L.		Dynamic Model	Determinsitic	Crop models				Rodríguez, D.; Cure, J. R.; Cotes, J. M.; Gutierrez, A. P.; Cantor, F. A Coffee Agroecosystem Model: I. Growth and Development of the Coffee Plant. Ecol. Modell. 2011, 222 (19), 3626–3639. https://doi.org/10.1016/j.ecolmodel.2011.08.003.
12	2011	Research	Africa	Ethiopia, Kenya, Rwanda, Tanzania and Uganda	Coffea Arabica L.	2050	Climex Model	Stochastic	Species distribution models	SRES	A2, B2		Jaramillo, J.; Muchugu, E.; Vega, F. E.; Davis, A.; Borgemeister, C.; Chabi-Olaye, A. Some like It Hot: The Influence and Implications of Climate Change on Coffee Berry Borer (Hypothenemus Hampei) and Coffee Production in East Africa. PLoS One 2011, 6 (9). https://doi.org/10.1371/journal.pone.0024528.
13	2012	Research	Africa	Ethiopia and Sudan	Coffea Arabica L.	2080	Maxent	Stochastic	Species distribution models	SRES	A1B, A2A, B2A		Davis, A. P.; Gole, T. W.; Baena, S.; Moat, J. The Impact of Climate Change on Indigenous Arabica Coffee (Coffea Arabica): Predicting Future Trends and Identifying Priorities. PLoS One 2012, 7 (11), e47981. https://doi.org/10.1371/journal.pone.0047981.
14	2012	Research	South America	Brazil	Coffea Arabica L.	2080	Multimodel ensemble	Stochastic	Species distribution models	SRES	A2, B2		Moraes, W. B.; De Jesus Junior, W. C.; De Azevedo Peixoto, L.; Moraes, W. B.; Coser, S. M.; Cecílio, R. A. Impact of Climate Change on the Phoma Leaf Spot of Coffee in Brazil. Interciencia 2012, 37 (4), 272–278.
15	2013	Research	South America	Brazil	Coffea Arabica L. and Coffea Robusta L.	2080	Multivariate Analysis	Determinsitic	Regression models	SRES	A2		De Carvalho Alves, M.; Da Silva, F. M.; Sanches, L.; De Carvalho, L. G.; E Silva Ferraz, G. A. Geospatial Analysis of Ecological Vulnerability of Coffee Agroecosystems in Brazil. Appl. Geomatics 2013, 5 (2), 87–97. https://doi.org/10.1007/s12518-013-0101-0.
16	2013	Report	North America	Haiti	Coffea Arabica L.	2050	Maxent	Stochastic	Species distribution models	SRES	A2		Eitzinger, A.; Läderach, P.; Carmona, S.; Navarro, C.; Collet, L. Prediction of the Impact of Climate Change on Coffee and Mango Growing Areas in Haiti; 2013.
17	2013	Research	Africa	Zimbabwe	Not Mentioned	2080	BRT, and GLM	Stochastic	Species distribution models	SRES	A2A		Kutywayo, D.; Chemura, A.; Kusena, W.; Chidoko, P.; Mahoya, C. The Impact of Climate Change on the Potential Distribution of Agricultural Pests: The Case of the Coffee White Stem Borer (Monochamus Leuconotus P.) in Zimbabwe. PLoS One 2013, 8 (8). https://doi.org/10.1371/journal.pone.0073432.
18	2017	Research	South America	Brazil	Coffea Arabica L.		Agrometerological Models	Stochastic	Crop models				Aparecido, L. E. O., de Souza Rolim, G., Camargo Lamparelli, R. A., de Souza, P. S., & dos Santos, E. R. (2017). Agrometeorological models for forecasting coffee yield. Agronomy Journal, 109(1), 249–258. https://doi.org/10.2134/agronj2016.03.0166
19	2014	Research	North America	Nicaragua, El Salvador, Guatemala and Mexico	Coffea Arabica L.	2050	Maxent	Stochastic	Species distribution models	SRES	A2A		Baca, M.; Laderach, P.; Haggar, J.; Schroth, G.; Ovalle, O. An Integrated Framework for Assessing Vulnerability to Climate Change and Developing Adaptation Strategies for Coffee Growing Families in Mesoamerica. PLoS One 2014, 9 (2). https://doi.org/10.1371/journal.pone.0088463.
20	2015	Research	Africa	Indonesia	Coffea Arabica L.	2050	Maxent	Stochastic	Species distribution models	SRES	A2A		Schroth, G.; Laderach, P.; Cuero, D. S. B.; Neilson, J.; Bunn, C. Winner or Loser of Climate Change? A Modeling Study of Current and Future Climatic Suitability of Arabica Coffee in Indonesia. Reg. Environ. Chang. 2015, 15 (7), 1473–1482. https://doi.org/10.1007/s10113-014-0713-x.
21	2015	Research	Worldwide	Worldwide	Coffea Arabica L.	2050	Maxent	Stochastic	Species distribution models	SRES	A2A		Ovalle-Rivera, O.; Läderach, P.; Bunn, C.; Obersteiner, M.; Schroth, G. Projected Shifts in Coffea Arabica Suitability among Major Global Producing Regions Due to Climate Change. PLoS One 2015, 10 (4). https://doi.org/10.1371/journal.pone.0124155.
22	2015	Research	Worldwide	Worldwide	Coffea Arabica L. and Coffea Robusta L.	2050	RF, Maxent, SVM	Stochastic	Species distribution models	RCP	RCP (2.6, 6.0, 8.5)		Bunn, C.; Läderach, P.; Rivera, O.O.; Kirschke, D. A bitter cup: climate change profile of global production of Arabica and Robusta coffee. Climatic Change. 2015,129(1):89-101.
23	2015	Research	Africa	Tanzania	Coffea Arabica L.	2030;2060	Autoregressive integrated moving average (ARIMA)	Determinsitic	Regression models	RCP			Craparo, A. C. W.; Van Asten, P. J. A.; Läderach, P.; Jassogne, L. T. P.; Grab, S. W. Coffea Arabica Yields Decline in Tanzania Due to Climate Change: Global Implications. Agric. For. Meteorol. 2015, 207, 1–10. https://doi.org/10.1016/j.agrformet.2015.03.005.
24	2015	Research	WorldWide	worldwide	Coffea Arabica L.	2050	RF	Stochastic	Species distribution models	RCP	RCP 6.0		Bunn, C.; Läderach, P.; Jimenez, J. G. P.; Montagnon, C.; Schilling, T. Multiclass Classification of Agro-Ecological Zones for Arabica Coffee: An Improved Understanding of the Impacts of Climate Change. PLoS One 2015, 10 (10). https://doi.org/10.1371/journal.pone.0140490.
25	2015	Research	Africa	Ethiopia	Coffea Arabica L.	2050	Dinamica EGO	Stochastic	Species distribution models	RCP	RCP 2.6,6.0		Hailu, B. T.; Maeda, E. E.; Pellikka, P.; Pfeifer, M. Identifying Potential Areas of Understorey Coffee in Ethiopia’s Highlands Using Predictive Modelling. Int. J. Remote Sens. 2015, 36 (11), 2898–2919. https://doi.org/10.1080/01431161.2015.1051631.
26	2016	Research	Africa	Zimbabwe	Coffea Arabica L.	2050	Maxent	Stochastic	Species distribution models	RCP	RCP 4.5		Chemura, A.; Kutywayo, D.; Chidoko, P.; Mahoya, C. Bioclimatic Modelling of Current and Projected Climatic Suitability of Coffee (Coffea Arabica) Production in Zimbabwe. Reg. Environ. Chang. 2016, 16 (2), 473–485. https://doi.org/10.1007/s10113-015-0762-9.
27	2016	Research	Asia	Nepal	Coffea Arabica L.	2050	Species Distribution Model	Stochastic	Species distribution models	RCP	RCP (2.6, 4.5, 6.0, 8.5)		Ranjitkar, S.; Sujakhu, N. M.; Merz, J.; Kindt, R.; Xu, J. C.; Matin, M. A.; Ali, M.; Zomer, R. J. Suitability Analysis and Projected Climate Change Impact on Banana and Coffee Production Zones in Nepal. PLoS One 2016, 11 (9). https://doi.org/10.1371/journal.pone.0163916.
28	2016	Research	North America	Hawaii	Not Mentioned		Irrigation Management System (IManSys) model	Stochastic	Crop models	SRES	B1 , A1F1		Fares, A.; Awal, R.; Fares, S.; Johnson, A. B.; Valenzuela, H. Irrigation Water Requirements for Seed Corn and Coffee under Potential Climate Change Scenarios. J. Water Clim. Chang. 2016, 7 (1), 39–51. https://doi.org/10.2166/wcc.2015.025.
29	2016	Research	Asia	India	Coffea Arabica L. and Coffea Robusta L.	2004	Climate based statistical regression model	Determinsitic	Regression models				Jayakumar, M.; Rajavel, M.; Surendran, U. Climate-Based Statistical Regression Models for Crop Yield Forecasting of Coffee in Humid Tropical Kerala, India. Int. J. Biometeorol. 2016, 60 (12), 1943–1952. https://doi.org/10.1007/s00484-016-1181-4.
30	2017	Research	South America	Brazil	Coffea Arabica L.	2070	Agrometerological Models	Stochastic	Crop models	RCP	RCP 4.5		Verhage, F. Y. F.; Anten, N. P. R.; Sentelhas, P. C. Carbon Dioxide Fertilization Offsets Negative Impacts of Climate Change on Arabica Coffee Yield in Brazil. Clim. Change 2017, 144 (4), 671–685. https://doi.org/10.1007/s10584-017-2068-z.
31	2017	Research	North America	Nicaragua	Coffea Arabica L.	2050	Maxent and CaNaSTA	Stochastic	Species distribution models	SRES	A2		Laderach, P.; Ramirez-Villegas, J.; Navarro-Racines, C.; Zelaya, C.; Martinez-Valle, A.; Jarvis, A. Climate Change Adaptation of Coffee Production in Space and Time. Clim. Change 2017, 141 (1), 47–62. https://doi.org/10.1007/s10584-016-1788-9.
32	2017	Research	South America	Latin America	Coffea Arabica L.	2050	Maxent	Stochastic	Species distribution models	RCP	RCP 4.5, 8.5		Imbach, P.; Fung, E.; Hannah, L.; Navarro-Racines, C. E.; Roubik, D. W.; Ricketts, T. H.; Harvey, C. A.; Donatti, C. I.; Läderach, P.; Locatelli, B.; Roehrdanz, P. R. Coupling of Pollination Services and Coffee Suitability under Climate Change. Proc. Natl. Acad. Sci. U. S. A. 2017, 114 (39), 10438–10442. https://doi.org/10.1073/pnas.1617940114.
33	2017	Report	Central America	Central America	Coffea Arabica L.	2050	RF	Stochastic	Species distribution models	RCP	RCP 6.0		Bunn, C. .; Castro, F. .; Lundy, M. . The Impact of Climate Change on Coffee Production in Central America; 2017.
34	2017	Research	Central America	Guatemala, Belize, El Salvador, Honduras, Nicaragua, Costa Rica and Panama	Coffea Arabica L.		agroecological land elevation for Coffea arabica L., ALIECA model	Stochastic	Species distribution models				Lara Estrada, L.; Rasche, L.; Schneider, U. A. Modeling Land Suitability for Coffea Arabica L. in Central America. Environ. Model. Softw. 2017, 95, 196–209. https://doi.org/https://doi.org/10.1016/j.envsoft.2017.06.028.
35	2017	Research	North America	Costa Rica	Coffea Arabica L.	2070	Maxent	Stochastic	Species distribution models	RCP	RCP (2.6, 8.5)		Coto-Fonseca, A.; Rojas, C.; Molina-Murillo, S. Climate Change-Based Modeling of Potential Land Use Arrangements for Coffee (Coffea Arabica) and Forest in Costa Rica. Agric. Eng. Int. CIGR J. 2017, 19 (4), 224–229.
36	2017	Research	Africa	Ethiopia	Coffea Arabica L.	2039	GLM, MaxEnt, RF, MARS, GAM, and GBM	Stochastic	Species distribution models	SRES	A1B ,A2		Moat, J.; Williams, J.; Baena, S.; Wilkinson, T.; Gole, T. W.; Challa, Z. K.; Demissew, S.; Davis, A. P. Resilience Potential of the Ethiopian Coffee Sector under Climate Change. Nat. Plants 2017, 3. https://doi.org/10.1038/nplants.2017.81.
37	2018	Research	North America	Puerto Rico	Coffea Arabica L. and Coffea Robusta L.	2040;2070	GIS (weight overlay analysis) ArC GIS	Stochastic	Species distribution models	SRES	A1, A1B, B2		Fain, S. J.; Quiñones, M.; Álvarez-Berríos, N. L.; Parés-Ramos, I. K.; Gould, W. A. Climate Change and Coffee: Assessing Vulnerability by Modeling Future Climate Suitability in the Caribbean Island of Puerto Rico. Clim. Change 2018, 146 (1–2), 175–186. https://doi.org/10.1007/s10584-017-1949-5.
38	2018	Research	South America	Brazil	Coffea Arabica L.	2041;2100	Etea			RCP	RCP 4.5, 8.5		Tavares, P. S.; Giarolla, A.; Chou, S. C.; Silva, A. J. P.; Lyra, A. A. Climate Change Impact on the Potential Yield of Arabica Coffee in Southeast Brazil. Reg. Environ. Chang. 2018, 18 (3), 873–883. https://doi.org/10.1007/s10113-017-1236-z.
39	2018	Research	Africa	Tanzania and Uganda	Coffea Arabica L.	2050	Mechanistic model	Stochastic	Crop models	RCP	RCP 6.0		Rahn, E.; Vaast, P.; Läderach, P.; van Asten, P.; Jassogne, L.; Ghazoul, J. Exploring Adaptation Strategies of Coffee Production to Climate Change Using a Process-Based Model. Ecol. Modell. 2018, 371, 76–89. https://doi.org/https://doi.org/10.1016/j.ecolmodel.2018.01.009.
40	2018	Research	South America	Colombia	Not Mentioned		Bioeconomic model	Determinsitic	Regression models				Atallah, S. S.; Gómez, M. I.; Jaramillo, J. A Bioeconomic Model of Ecosystem Services Provision: Coffee Berry Borer and Shade-Grown Coffee in Colombia. Ecol. Econ. 2018, 144, 129–138. https://doi.org/https://doi.org/10.1016/j.ecolecon.2017.08.002.
41	2018	Research	Africa	Tanzania	Coffea Arabica L.	2055	Insect Life Cycle Model (ILCYM)	Stochastic	Species distribution models	RCP	RCP 4.5		Azrag, A. G. A.; Pirk, C. W. W.; Yusuf, A. A.; Pinard, F.; Niassy, S.; Mosomtai, G.; Babin, R. Prediction of Insect Pest Distribution as Influenced by Elevation: Combining Field Observations and Temperature-Dependent Development Models for the Coffee Stink Bug, Antestiopsis Thunbergii (Gmelin). PLoS One 2018, 13 (6). https://doi.org/10.1371/journal.pone.0199569.
43	2019	Research	Africa	Indonesia	Coffea Arabica L.	2050	Maxent	Stochastic	Species distribution models	RCP	RCP 4.5		Purba, P.; Sukartiko, A. C.; Ainuri, M. Modeling the Plantation Area of Geographical Indication Product under Climate Change: Gayo Arabica Coffee (Coffea Arabica). In IOP Conference Series: Earth and Environmental Science; 2019; Vol. 365. https://doi.org/10.1088/1755-1315/365/1/012021.
44	2019	Research	South America	Brazil	Coffea Arabica L.	2013	Autoregressive integrated moving average (ARIMA)	Determinsitic	Regression models				Ferreira, W. P. M.; Ribeiro Júnior, J. I.; de Fátima Souza, C. Climate Change Does Not Impact on Coffea Arabica Yield in Brazil. J. Sci. Food Agric. 2019, 99 (12), 5270–5282. https://doi.org/10.1002/jsfa.8465.
45	2019	Research	Africa	Ethiopia and Sudan	Coffea Arabica L.	2088	GLM, MaxEnt, RF, MARS, GAM, and GBM	Stochastic	Species distribution models	SRES	A1B ,A2		Moat, J.; Gole, T. W.; Davis, A. P. Least Concern to Endangered: Applying Climate Change Projections Profoundly Influences the Extinction Risk Assessment for Wild Arabica Coffee. Glob. Chang. Biol. 2019, 25 (2), 390–403. https://doi.org/10.1111/gcb.14341.
46	2019	Research	South America	Brazil	Coffea Arabica L.	2080	Regression Model	Determinsitic	Regression models	RCP	RCP 8.5		Alfonsi, W. M. V; Coltri, P. P.; Júnior, J. Z.; Patrício, F. R. A.; do Valle Gonçalves, R. R.; Shinji, K.; Alfonsi, E. L.; Koga-Vicente, A. Geographical Distribution of the Incubation Period of Coffee Leaf Rust in Climate Change Scenarios. Pesqui. Agropecu. Bras. 2019, 54. https://doi.org/10.1590/S1678-3921.PAB2019.V54.00273.
47	2020	Research	South America	Brazil	Coffea Arabica L.	2050	Maxent	Stochastic	Species distribution models	RCP	RCP 4.5		Gomes, L. C.; Bianchi, F. J. J. A.; Cardoso, I. M.; Fernandes, R. B. A.; Filho, E. I. F.; Schulte, R. P. O. Agroforestry Systems Can Mitigate the Impacts of Climate Change on Coffee Production: A Spatially Explicit Assessment in Brazil. Agric. Ecosyst. Environ. 2020, 294, 106858. https://doi.org/https://doi.org/10.1016/j.agee.2020.106858.
48	2020	Research	Africa	Ethiopia	Coffea Arabica L.		Yield SAFE Model	Determinsitic	Crop models	RCP	RCP 4.5, 8.5		Gidey, T.; Oliveira, T. S.; Crous-Duran, J.; Palma, J. H. N. Using the Yield-SAFE Model to Assess the Impacts of Climate Change on Yield of Coffee (Coffea Arabica L.) under Agroforestry and Monoculture Systems. Agrofor. Syst. 2020, 94 (1), 57–70. https://doi.org/10.1007/s10457-019-00369-5.
49	2020	Research	South America	Brazil	Coffea Arabica L.	2017	Econometric model	Determinsitic	Regression models				Koh, I.; Garrett, R.; Janetos, A.; Mueller, N. D. Climate Risks to Brazilian Coffee Production. Environ. Res. Lett. 2020, 15 (10). https://doi.org/10.1088/1748-9326/aba471.
50	2020	Research	North America	Nicaragua and Costa Rica	Coffea Arabica L.		Dynamic Model	Stochastic	Crop models				Ovalle-Rivera, O.; Van Oijen, M.; Laderach, P.; Roupsard, O.; Virginio Filho, E. de M.; Barrios, M.; Rapidel, B. Assessing the Accuracy and Robustness of a Process-Based Model for Coffee Agroforestry Systems in Central America. Agrofor. Syst. 2020, 94 (5), 2033–2051. https://doi.org/10.1007/s10457-020-00521-6.
51	2021	Research	South America	Colombia	Coffea Arabica L.	2060	Econometric model	Determinsitic	Regression models	RCP	RCP (2.6, 4.5 6.0)		Ceballos-Sierra, F.; Dall’Erba, S. The Effect of Climate Variability on Colombian Coffee Productivity: A Dynamic Panel Model Approach. Agric. Syst. 2021, 190, 103126. https://doi.org/https://doi.org/10.1016/j.agsy.2021.103126.
52	2021	Report	Africa	Ethiopia	Coffea Arabica L.	2030, 2070,2090	BFT, RF, and SVM	Stochastic	Species distribution models	RCP	RCP (2.6, 4.5, 6.0, 8.5)		Chemura, A.; Mudereri, BT.; Yalew. A.W.; Gornott C. Climate change and specialty coffee potential in Ethiopia. Scientific reports. 2021,14:11(1):1-3. doi:org/10.1038/s41598-021-87647-4
53	2020	Research	North America	Costa Rica	Coffea Arabica L.		DynaCof Model	Stochastic	Crop models				Vezy, R., le Maire, G., Christina, M., Georgiou, S., Imbach, P., Hidalgo, H. G., Alfaro, E. J., Blitz-Frayret, C., Charbonnier, F., Lehner, P., Loustau, D., & Roupsard, O. (2020). DynACof: A process-based model to study growth, yield and ecosystem services of coffee agroforestry systems. Environmental Modelling and Software, 124. https://doi.org/10.1016/j.envsoft.2019.104609
54	2022	Research	Africa	Ethiopia	Coffea Arabica L.	2060	Generalized Regression model (GRM)	Determinsitic	Deterministic	RCP	RCP 4.5, 8.5		Chalchissa, F. B., Diga, G. M., Feyisa, G. L., & Tolossa, A. R. (2022). Impacts of extreme agroclimatic indicators on the performance of coffee (Coffea arabica L.) aboveground biomass in Jimma Zone, Ethiopia. Heliyon, 8(8). https://doi.org/10.1016/j.heliyon.2022.e10136
55	2022	Research	Central America	Nicaragua, El Salvador, Guatemala and Mexico	Coffea Arabica L.	2050	Maxent	Stochastic	Species distribution models	SRES	A2		Quiroz-Guerrero, I., Pérez-Vázquez, A., Landeros-Sánchez, C., Gallardo-López, F., Velasco-Velasco, J., & Benítez-Badillo, G. (2022). RESILIENCE OF COFFEE AGROECOSYSTEMS IN LIGHT OF CLIMATE CHANG [RESILIENCIA DEL AGROECOSISTEMA CAFÉ ANTE EL CAMBIO CLIMÁTICO]. Tropical and Subtropical Agroecosystems, 25(3). https://doi.org/10.56369/TSAES.4161
56	2022	Research	Asia	China	Coffea Arabica L.	2060;2100	Maxent	Stochastic	Species distribution models	SSPs	SSPs(1,2,3,5)		Zhang, S., Liu, B., Liu, X., Yuan, Q., Xiao, X., & Zhou, T. (2022). Maximum Entropy Modeling for the Prediction of Potential Plantation Distribution of Arabica coffee under the CMIP6 Mode in Yunnan, Southwest China. Atmosphere, 13(11), 1773. https://doi.org/10.3390/atmos13111773
57	2022	Research	Africa	Uganda, Ethiopia, Anglo,Tanzania	Coffea Robusta L.	2050	Generailized Additive Model	Stochastic	Species distribution models	RCP	RCP 4.5, 8.5		Tournebize, R., Borner, L., Manel, S., Meynard, C. N., Vigouroux, Y., Crouzillat, D., Fournier, C., Kassam, M., Descombes, P., Tranchant-Dubreuil, C., Parrinello, H., Kiwuka, C., Sumirat, U., Legnate, H., Kambale, J.-L., Sonké, B., Mahinga, J. C., Musoli, P., Janssens, S., … Poncet, V. (2022). Ecological and genomic vulnerability to climate change across native populations of Robusta coffee (Coff…
58	2022	Research	Africa	Uganda	Coffea Arabica L. and Coffea Robusta L.	2039	EcoCrop	Stochastic	Stochastic	RCP	RCP 4.5, 8.5		Mulinde, C., Majaliwa, J. G. M., Twinomuhangi, R., Mfitumukiza, D., Waiswa, D., Tumwine, F., Kato, E., Asiimwe, J., Nakyagaba, W. N., & Mukasa, D. (2022). Projected climate in coffee-based farming systems: implications for crop suitability in Uganda. Regional Environmental Change, 22(3). https://doi.org/10.1007/s10113-022-01930-2
59	2022	Research	Africa	Ethiopia	Coffea Robusta L.	2050;2070	Maxent	Stochastic	Species distribution models	RCP	RCP 4.5, 8.5		Benti, F., Diga, G. M., Feyisa, G. L., & Tolesa, A. R. (2022). Modeling coffee (Coffea arabica L.) climate suitability under current and future scenario in Jimma zone, Ethiopia. Environmental Monitoring and Assessment, 194(4). https://doi.org/10.1007/s10661-022-09895-9
60	2022	Research	South America	Brazil	Coffea Robusta L.	2100	Regression Equation	Determinsitic	Regression Model	SSPs	SSPs1		de Carvalho Alves, M., & Sanches, L. (2022). Potential Effects of Spatio-Temporal Temperature Variation for Monitoring Coffee Leaf Rust Progress Under CMIP6 Climate Change Scenarios. Earth Systems and Environment, 6(2), 421–436. https://doi.org/10.1007/s41748-021-00286-7
61	2022	Research	Worldwide	worldwide	Coffea Arabica L.	2050;2095	Generailized Additive Model	Stochastic	Species Distribution Model				Kath, J, Craparo, A., Fong, Y., Byrareddy, V., Davis, A. P., King, R., Nguyen-Huy, T., van Asten, P. J. A., Marcussen, T., Mushtaq, S., Stone, R., & Power, S. (2022). Vapour pressure deficit determines critical thresholds for global coffee production under climate change. Nature Food, 3(10), 871–880. https://doi.org/10.1038/s43016-022-00614-8
62	2022	Research	Africa	Ethiopia	Not Mentioned	2060	Regression Equation	Determinsitic	Regression Model	SSPs	SSPs(1,2,3,5)		Ginbo, T. (2022). Heterogeneous impacts of climate change on crop yields across altitudes in Ethiopia. Climatic Change, 170(1–2). https://doi.org/10.1007/s10584-022-03306-1
